# Supplementary material
Source: publisher figshare collection journal article supplement (https://frontiersin.figshare.com/ndownloader/files/14810144)
Supplement: Supplementary file [file 14810144]

## Supplement B. Summary of results

### *The Maternal Line*

Supplementary Table B1. The maternal grandparents (G0)

| Variable considered         | a    | b    | c    | d    | e  |
|-----------------------------|------|------|------|------|----|
| MGM's year of birth         | **** | -    | -    | **** | ** |
| MGM's education level       | **** | **** | **** | **   | *  |
| MGM's age at mother's birth | ***  | -    | -    | **   |    |
| MGM's social class          | **** | -    | -    | **   |    |
| MGF's year of birth         | **** | **** | **** | **** | ** |
| MGF's education level       | **** | -    | -    | **   | ** |
| MGF ever smoked             | ***  | -    | -    | **   |    |
| MGF's age at mother's birth | **** | -    | -    | ***  |    |
| MGF's social class          | **** | -    | -    | ***  | *  |

Variables that are associated with mean fat mass in the following categories: (a) all unadjusted; (b) all adjusted in subgroup model; (c) adjusted in final model; (d) female grandchildren (G2) unadjusted; (e) male grandchildren (G2) unadjusted. \*P<0.05; \*\*P<0.01; \*\*\*P<0.001; \*\*\*\*P<0.0001.

.

Supplementary Table B2. The mother (G1) in early childhood

| Variable considered                      | a    | b    | c    | d    | e   |
|------------------------------------------|------|------|------|------|-----|
| M's year of birth                        | **** | **** | **** | **** | *** |
| M was born in Avon                       | **** | **   | -    | **   | **  |
| M was born post-term                     | **   | **   | *    |      |     |
| M was breast fed                         | **** | **   | -    | *    | *   |
| M was badly scalded aged 6-11            | *    | *    | **   |      | *   |
| M had a head injury aged 6-11            | *    | -    | -    |      |     |
| M nearly drowned aged 6-11               | *    | **   | *    |      |     |
| M had a serious accident 6-11            | *    | -    | -    |      | *   |
| M lived with a stepfather 6-11           | -    | -    | -    | *    |     |
| M's parents divorced/separated Aged 6-11 | *    | -    |      |      |     |

Variables that are associated with mean fat mass in the following categories: (a) all unadjusted; (b) all adjusted in subgroup model; (c) adjusted in final model; (d) female grandchildren (G2) unadjusted; (e) male grandchildren (G2) unadjusted. \*P<0.05; \*\*P<0.01; \*\*\*P<0.001; \*\*\*\*P<0.0001.

Supplementary Table B3. The mother (G1) in mid-childhood

| Variables considered                     | a    | b    | c  | d    | e  |
|------------------------------------------|------|------|----|------|----|
| MGM in household when M 6-11             | **   | **   | -  | ***  |    |
| MGF in household when M 6-11             | **** | -    | -  | **** |    |
| Step-father in household when M 6-11     | *    | *    | -  | *    |    |
| M's grandfather in household when M 6-11 | *    | **   | ** | **   |    |
| M had history of daytime wetting 6-11    | *    | **   | -  | *    |    |
| M fractured arm aged 6-11                | **   | **   | -  | *    |    |
| M's periods started before age 12        | **** | **** | ** | **** | ** |

Variables that are associated with mean fat mass in the following categories: (a) all unadjusted; (b) all adjusted in subgroup model; (c) adjusted in final model; (d) female grandchildren (G2) unadjusted; (e) male grandchildren (G2) unadjusted. \*P<0.05; \*\*P<0.01; \*\*\*P<0.001; \*\*\*\*P<0.0001.

Supplementary Table B4. The mother (G1) in late-childhood

| Variables considered                    | a    | b    | c  | d    | e    |
|-----------------------------------------|------|------|----|------|------|
| MGM in household when M 12-15           | **   | -    | -  | **   | **   |
| MGF in household when M 12-15           | *    | -    | -  |      |      |
| M had a head injury when M 12-15        | *    | -    | -  |      |      |
| M began smoking aged 12-15              | **** | **** | ** | **** | **** |
| M admitted to hospital aged 12-15       | *    | -    | -  |      |      |
| M's parent had an accident when M 12-15 | *    | *    | *  |      |      |
| M became pregnant aged 12-15            | *    | -    | -  |      |      |
| M suspended from school aged 12-15      | *    | -    | -  |      |      |

Variables that are associated with mean fat mass in the following categories: (a) all unadjusted; (b) all adjusted in subgroup model; (c) adjusted in final model; (d) female grandchildren (G2) unadjusted; (e) male grandchildren (G2) unadjusted. \*P<0.05; \*\*P<0.01; \*\*\*P<0.001; \*\*\*\*P<0.0001.

Supplementary Table B5. The mother (G1) in other aspects of childhood (&lt;17)

| Variables considered           | a  | b  | c | d  | e |
|--------------------------------|----|----|---|----|---|
| M attended <3 schools          | *  | *  | - |    | * |
| M attended a special school    | *  | *  | - | ** |   |
| M was in care                  | ** | -  | - | ** |   |
| M lived with her grandparents  | ** | ** | - | *  | * |
| M stayed in a children's home  | *  | -  | - | *  |   |
| M's mother was over-protective | *  | -  | - |    |   |

Variables that are associated with mean fat mass in the following categories: (a) all unadjusted; (b) all adjusted in subgroup model; (c) adjusted in final model; (d) female grandchildren (G2) unadjusted; (e) male grandchildren (G2) unadjusted. \*P<0.05; \*\*P<0.01; \*\*\*P<0.001; \*\*\*\*P<0.0001.

### *The Paternal Line*

Supplementary Table B6. The paternal grandparents (G0)

| Variable considered         | a    | b    | c   | d    | e   |
|-----------------------------|------|------|-----|------|-----|
| PGM's year of birth         | **   | -    | -   | **   |     |
| PGM's education level       | **   | -    | -   | ***  |     |
| PGM's age at father's birth | *    | -    | -   | **   |     |
| PGM's social class          | -    | -    | -   | -    |     |
| PGF's year of birth         | *    | **** | -   |      |     |
| PGF's education level       | *    | -    | -   | **   |     |
| PGF ever smoked             | *    | -    | -   |      | *   |
| PGF's age at father's birth | -    | -    | -   |      |     |
| PGF's social class          | **** | **** | *** | **** | *   |
| PGM smoked in pregnancy     | *    | (*)  | *** | DNA  | DNA |
| X sex of G2                 |      |      |     |      |     |

Variables that are associated with mean fat mass in the following categories: (a) all unadjusted; (b) all adjusted in subgroup model; (c) adjusted in final model; (d) female grandchildren (G2) unadjusted; (e) male grandchildren (G2) unadjusted. DNA = Does not apply. \*P<0.05; \*\*P<0.01; \*\*\*P<0.001; \*\*\*\*P<0.0001.

Supplementary Table B7. The father (G1) in early/mid childhood

| Variables considered                          | a   | b    | c    | d  | e  |
|-----------------------------------------------|-----|------|------|----|----|
| F born in Avon                                | **  | **   | -    |    |    |
| F nearly drowned when 6-11                    | *   | *    | -    |    |    |
| F had head injury aged 6-11                   | *   | **   | **   |    |    |
| F had step-father at home 6-11                | *   |      | -    | ** |    |
| F's father died when he was 6-11              | (*) |      | -    | *  |    |
| F started smoking regularly <11               | *   | **** | **** |    | *  |
| F often absent from school <11                | *   |      | -    |    |    |
| F often absent from school due to illness <11 | *   |      | -    |    | ** |
| F often truant from school aged <11           | **  | *    | -    | *  |    |

Variables that are associated with mean fat mass in the following categories: (a) all unadjusted; (b) all adjusted in subgroup model; (c) adjusted in final model; (d) female grandchildren (G2) unadjusted; (e) male grandchildren (G2) unadjusted. (\*)P<0.10; \*P<0.05; \*\*P<0.01; \*\*\*P<0.001; \*\*\*\*P<0.0001.

Supplementary Table B8. The father (G1) in other childhood variables

| Variables considered                           | a    | b    | c   | d    | e   |
|------------------------------------------------|------|------|-----|------|-----|
| PGF in household when F aged 12-15             | **   | -    | -   | **** |     |
| F's stepfather in household when F 12-15       | *    | *    | -   | *    |     |
| F started smoking when aged 12-15              | **   | -    | -   | *    |     |
| F often absent from school when aged 11+       | **** | **** | *** | **   | *   |
| F absent from school because of illness 11+    | **   | -    | -   |      | *** |
| F truant from school aged 11+                  | **   | -    | -   | *    |     |
| Degree to which F disliked school              | **   | -    | -   | ***  |     |
| Degree to which F did not find school valuable | *    | -    | -   | **   |     |
| F lived with foster parents < 17               | *    | -    | -   |      | *   |
| F spent time in a children's home <17          | **   | **   | -   |      | *   |
| F's mother's degree of instability             | *    | *    | -   |      | *   |

Variables that are associated with mean fat mass in the following categories: (a) all unadjusted; (b) all adjusted in subgroup model; (c) adjusted in final model; (d) female grandchildren (G2) unadjusted; (e) male grandchildren (G2) unadjusted. \*P<0.05; \*\*P<0.01; \*\*\*P<0.001; \*\*\*\*P<0.0001.
